# Supplementary material
Source: PubMed Central journal article supplement (PMC3551289)
Supplement: NIHMS421415-supplement-Supplemental_Documents.pdf [file NIHMS421415-supplement-Supplemental_Documents.pdf]

## Supplementary Online Content

Gibbons RD, Weiss DJ, Pilkonis PA, Frank E, Moore T, Kim JB, Kupfer DJ. Development of a computerized adaptive test for depression: the CAT-DI. *Arch Gen Psychiatry*. doi:10.1001/archgenpsychiatry.2012.14.

### **eAppendix. Technical Appendix**

#### **eTable 1. Domain: Depression**

#### **eTable 2. Depression and Depression-Related Rating Scales**

This supplementary material has been provided by the authors to give readers additional information about their work.

# eAppendix. Technical Appendix

## 1 Item Factor Analysis Based on Item Response Theory

IRT-based item factor analysis makes use of all information in the original categorical responses and does not depend on pairwise indices of association such as tetrachoric or polychoric correlation coefficients. For that reason it is referred to as *full information* item factor analysis. It works directly with item response models giving the probability of the observed categorical responses as a function of latent variables descriptive of the respondents and parameters descriptive of the individual items. It differs from the classical formulation in its scaling, however, because it does not assume that the response process has unit standard deviation and zero mean; rather it assumes that the *residual* term has unit standard deviation and zero mean. The latter assumption implies that the response processes have zero mean and standard deviation equal to

$$\sigma_{y_j} = \sqrt{1 + \sum_v^d \alpha_{jv}^2}.$$

Inasmuch as the scale of the model affects the relative size of the factor loadings and thresholds, we rewrite the model for dichotomous responses in a form in which the factor loadings are replaced by factor slopes,  $a_{jv}$ , and the threshold is absorbed in the intercept,  $c_j$ :

$$y_j = \sum_{v=1}^d a_{jv} \theta_v + c_j + \varepsilon_j.$$

To convert factor slopes into loadings we divide by the above standard deviation and similarly convert the intercepts to thresholds:

$$\alpha_{jv} = a_{jv} / \sigma_{y_j} \quad \text{and} \quad \gamma_j = -c_j / \sigma_{y_j}.$$

Conversely, to convert to factor analysis units, we change the standard deviation of the residual from 1 to

$$\sigma_{\varepsilon_j}^* = \sqrt{1 - \sum_v^d \alpha_{jv}^2},$$

and change the scale of the slopes and intercept accordingly:

$$a_{jv} = \alpha_{jv} / \sigma_{\varepsilon_j}^* \quad \text{and} \quad c_j = -\gamma_j / \sigma_{\varepsilon_j}^*.$$

For polytomous responses, the model generalizes as:

$$z_j = \sum_{v=1}^d a_{jv} \theta_v,$$

$$P_{jh}(\theta) = \Phi(z_j + c_{jh}) - \Phi(z_j + c_{j,h-1}),$$

where  $\Phi(z_j + c_{j0}) = 0$  and  $\Phi(z_j + c_{jm_j}) = 1 - \Phi(z_j + c_{j,m_j-1})$  as previously. In the context of item factor analysis, this is the multidimensional generalization of the *graded* model introduced by Samejima (1969).

## 2 Confirmatory Item Factor Analysis

In confirmatory factor analysis, indeterminacy of rotation is resolved by assigning arbitrary fixed values to certain loadings of each factor during maximum likelihood estimation. An important example of confirmatory item factor analysis is the bi-factor pattern for general and group factors, which applies to tests and scales with item content drawn from several well-defined sub-areas of the domain in question. To analyze these kinds of structures for dichotomously scored item responses, Gibbons & Hedeker (1992) developed full-information item bi-factor analysis for binary item responses, and Gibbons extended it to the polytomous case (Gibbons et.al., 2007). To illustrate, consider a set of  $n$  test items for which a  $d$ -factor solution exists with one general factor and  $d - 1$  group or method-related factors. The bi-factor solution constrains each item  $j$  to a non-zero loading  $\alpha_{j1}$  on the primary dimension and a second loading ( $\alpha_{jv}, v = 2, \dots, d$ ) on not more than one of the  $d - 1$  group factors. For four items, the bi-factor pattern matrix might be

$$\mathbf{\alpha} = \begin{bmatrix} \alpha_{11} & \alpha_{12} & 0 \\ \alpha_{21} & \alpha_{22} & 0 \\ \alpha_{31} & 0 & \alpha_{33} \\ \alpha_{41} & 0 & \alpha_{43} \end{bmatrix}$$

This structure, which Holzinger & Swineford (1937) termed the "bi-factor" pattern, also appears in the inter-battery factor analysis of Tucker (1958) and is one of the confirmatory factor analysis models considered by Jöreskog (1969). In the latter case, the model is restricted to test scores assumed to be continuously distributed. However, the bi-factor pattern might also arise at the item level (Muthén, 1989). Gibbons & Hedeker (1992) showed that paragraph comprehension tests, where the primary dimension represents the targeted process skill and additional factors describe content area knowledge within paragraphs, were described well by the bi-factor model. In this context, they showed that items were conditionally independent between paragraphs, but conditionally dependent within paragraphs.

The bi-factor restriction leads to a major simplification of likelihood equations that (1) permits analysis of models with large numbers of group factors since the integration always simplifies to a two-dimensional problem, (2) permits conditional dependence among identified subsets of items, and (3) in many cases, provides more parsimonious factor solutions than an unrestricted full-information item factor analysis.

### 3 The Bi-factor Model

In the bi-factor case, the graded response model is

$$z_{jh}(\theta) = \sum_{v=1}^d a_{jv} \theta_v + c_{jh}, \quad (1)$$

where only one of the  $v=2, \dots, d$  values of  $a_{jv}$  is non-zero in addition to  $a_{j1}$ . Assuming independence of the  $\theta$ , in the unrestricted case, the multidimensional model above would require a  $d$ -fold integral in order to compute the unconditional probability for response pattern  $\mathbf{u}$ , i.e.,

$$P(\mathbf{u} = \mathbf{u}_i) = \int_{-\infty}^{\infty} \int_{-\infty}^{\infty} \dots \int_{-\infty}^{\infty} L_i(\theta) g(\theta_1) g(\theta_2) \dots g(\theta_d) d\theta_1 d\theta_2 \dots d\theta_d, \quad (2)$$

for which numerical approximation is limited as previously described. Gibbons & Hedeker (1992) showed that for the binary response model, the bi-factor restriction always results in a two-dimensional integral regardless of the number of dimensions, one for  $\theta_1$  and the other for  $\theta_v, v > 1$ . The reduction formula is due to Stuart (1958), who showed that if  $n$  variables follow a standardized multivariate normal distribution where the correlation  $\rho_{ij} = \sum_{v=1}^d \alpha_{iv} \alpha_{jv}$  and  $\alpha_{iv}$  is nonzero for only one  $v$ , then the probability that respective variables are simultaneously less than  $\gamma_j$  is given by,

$$P = \prod_{v=1}^d \int_{-\infty}^{\infty} \left\{ \prod_{j=1}^n \left[ \Phi \left( \frac{\gamma_j - \alpha_{jv} \theta}{\sqrt{1 - \alpha_{jv}^2}} \right) \right]^{u_{jv}} \right\} g(\theta) d\theta, \quad (3)$$

where  $\gamma_j = -c_j/y_j$ ,  $\alpha_{jv} = a_{jv}/y_j$ ,  $y_j = (1 + a_{j1}^2 + a_{jv}^2)^{1/2}$ ,  $u_{jv} = 1$  denotes a nonzero loading of item  $j$  on dimension  $v$  ( $v = 1, \dots, d$ ), and  $u_{jv} = 0$  otherwise. Note that for item  $j$ ,  $u_{jv} = 1$  for only one  $d$ . Note also that  $\gamma_j$  and  $\alpha_{jv}$  used by Stuart (1958) are equivalent to the item threshold and factor loading, and are related to the more traditional IRT parameterization as described above.

This result follows from the fact that if each variate is related only to a single dimension, then the  $d$  dimensions are independent and the joint probability is the product of  $d$  unidimensional probabilities. In this context, the result applies only to the  $d-1$  content dimensions (i.e.,  $v = 2, \dots, d$ ). If a primary dimension exists, it will not be independent of the other  $d-1$  dimensions, since each item now loads on each of two dimensions. Gibbons & Hedeker (1992) derived the necessary two-dimensional generalization of Stuart's (1958) original result as

$$P = \int_{-\infty}^{\infty} \left\{ \prod_{v=2}^d \int_{-\infty}^{\infty} \left[ \prod_{j=1}^n \left( \Phi \left[ \frac{\gamma_j - \alpha_{j1} \theta_1 - \alpha_{jv} \theta_v}{\sqrt{1 - \alpha_{j1}^2 - \alpha_{jv}^2}} \right] \right)^{u_{jv}} \right] g(\theta_v) d\theta_v \right\} g(\theta_1) d\theta_1, \quad (4)$$

For the graded response model, the probability of a value less than the category threshold  $\gamma_{jh} = -c_{jh}/y_j$  can be obtained by substituting  $\gamma_{jh}$  for  $\gamma_j$  in the previous equation. Let  $\delta_{ijh} = 1$  if person  $i$  responds positively to item  $j$  in category  $h$  and  $\delta_{ijh} = 0$  otherwise. The unconditional probability of a particular response pattern  $\mathbf{u}_i$  is then

$$P(\mathbf{u} = \mathbf{u}_i) = \int_{-\infty}^{\infty} \left\{ \prod_{v=2}^d \int_{-\infty}^{\infty} \left[ \prod_{j=1}^n \prod_{h=1}^{m_j} (\Phi_{jh}(\theta_1, \theta_v) - \Phi_{jh-1}(\theta_1, \theta_v))^{\delta_{ijh} \cdot u_{jv}} \right] g(\theta_v) d\theta_v \right\} g(\theta_1) d\theta_1, \quad (5)$$

which can be approximated to any degree of practical accuracy using two-dimensional Gauss-Hermite quadrature, since for both the binary and graded bi-factor response models, the dimensionality of the integral is 2 regardless of the number of subdomains (i.e.,  $d-1$ ) that comprised the scale.

## 4 Parameter Estimation

Gibbons & Hedeker (1992) showed how parameters of the item bi-factor model for binary responses can be estimated by maximum marginal likelihood using a variation of the EM algorithm described by Bock & Aitkin (1981). For the graded case, the likelihood equations are derived as follows.

Denoting the  $v$ th subset of the components of  $\theta$  as  $\theta_v^* = \begin{bmatrix} \theta_1 \\ \theta_v \end{bmatrix}$ , let

$$\begin{aligned} P_i &= P(\mathbf{u} = \mathbf{u}_i) \\ &= \int_{\theta_1} \left\{ \prod_{v=2}^d \int_{\theta_v} \left[ \prod_{j=1}^n \prod_{h=1}^{m_j} (\Phi_{jh}(\theta_v^*) - \Phi_{jh-1}(\theta_v^*))^{\delta_{ijh} \cdot u_{jv}} \right] g(\theta_v) d\theta_v \right\} g(\theta_1) d\theta_1 \\ &= \int_{\theta_1} \left\{ \prod_{v=2}^d \int_{\theta_v} L_{iv}(\theta_v^*) g(\theta_v) d\theta_v \right\} g(\theta_1) d\theta_1, \end{aligned} \quad (6)$$

where

$$L_{iv}(\theta_v^*) = \prod_{j=1}^n \prod_{h=1}^{m_j} (\Phi_{jh}(\theta_v^*) - \Phi_{jh-1}(\theta_v^*))^{\delta_{ijh} \cdot u_{jv}}.$$

Then the log-likelihood is

$$\log L = \sum_{i=1}^s r_i \log P_i, \quad (7)$$

where  $s$  denotes number of unique response patterns, and  $r_i$  the frequency of pattern  $i$ . As the number of items gets large,  $s$  typically is the number of respondents and  $r_i = 1$ . Complete details of the likelihood equations and their solution are provided in Gibbons et.al. (2007).

## 5 Trait Estimation

In practice, the ultimate objective is to estimate the trait level of person  $i$  on the primary trait the instrument was designed to measure. For the bi-factor model, the goal is to estimate the latent variable  $\theta_1$  for person  $i$ . A good choice for this purpose (Bock & Aitkin, 1981) is the expected *a posteriori* (EAP) value (Bayes estimate) of  $\theta_1$ , given the observed response vector  $\mathbf{u}_i$  and levels of the other subdimensions  $\theta_2 \dots \theta_d$ . The Bayesian estimate of  $\theta_1$  for person  $i$  is:

$$\hat{\theta}_{1i} = E(\theta_{1i} | \mathbf{u}_i, \theta_{2i} \dots \theta_{di}) = \frac{1}{P_i} \int_{\theta_1} \theta_{1i} \left\{ \prod_{v=2}^d \int_{\theta_v} L_{iv}(\theta_v^*) g(\theta_v) d\theta_v \right\} g(\theta_1) d\theta_1. \quad (8)$$

Similarly, the posterior variance of  $\hat{\theta}_{1i}$ , which may be used to express the precision of the EAP estimator, is given by

$$V(\theta_{1i} | \mathbf{u}_i, \theta_{2i} \dots \theta_{di}) = \frac{1}{P_i} \int_{\theta_1} (\theta_{1i} - \hat{\theta}_{1i})^2 \left\{ \prod_{v=2}^d \int_{\theta_v} L_{iv}(\theta_v^*) g(\theta_v) d\theta_v \right\} g(\theta_1) d\theta_1. \quad (9)$$

These quantities can be evaluated using Gauss-Hermite quadrature as previously described.

In some applications, we are also interested in estimating a person's location on the secondary domains of interest as well. For the  $v$ th sub-domain, the EAP estimate and its variance can be written as:

$$\hat{\theta}_{vi} = E(\theta_{vi} | \mathbf{u}_i, \theta_{1i}) = \frac{1}{P_i} \int_{\theta_v} \theta_{vi} \left\{ \int_{\theta_1} L_{iv}(\theta_v^*) g(\theta_1) d\theta_1 \right\} g(\theta_v) d\theta_v, \quad (10)$$

and

$$V(\theta_{vi} | \mathbf{u}_i, \theta_{1i}) = \frac{1}{P_i} \int_{\theta_v} (\theta_{vi} - \hat{\theta}_{vi})^2 \left\{ \int_{\theta_1} L_{iv}(\theta_v^*) g(\theta_1) d\theta_1 \right\} g(\theta_v) d\theta_v. \quad (11)$$

## 6 Item Information Functions

Suppose there are  $i = 1, 2, \dots, N$  examinees, and  $j = 1, 2, \dots, n$  items. Let the probability of a response in category  $h = 1, 2, \dots, m_j$  to graded response item  $j$  for examinee  $i$  with factor  $\theta$  be denoted by  $P_{ijh}(\theta)$ . We call  $P_{ijh}(\theta)$  a category probability.  $P_{ijh}(\theta)$  is given by the difference between two adjacent boundaries.

$$P_{ijh}(\theta) = P(x_{ij} = h | \theta) = P_{ijh}^*(\theta) - P_{ijh-1}^*(\theta) \quad (12)$$

where  $P_{ijh}^*(\theta)$  is the boundary probability. The boundary probability  $P_{ijh}^*$  and category probability  $P_{ijh}(\theta)$  are related as:

$$\begin{aligned} P_{ij0}^* &= 0, \\ P_{ij1}^* &= P_{ij1}(\theta), \\ P_{ij2}^* &= P_{ij1}(\theta) + P_{ij2}(\theta), \\ &\dots \\ P_{ijh}^* &= P_{ij1}(\theta) + P_{ij2}(\theta) + \dots + P_{ijh}(\theta), \\ &\dots \\ P_{ijm_j}^* &= P_{ij1}(\theta) + P_{ij2}(\theta) + \dots + P_{ijm_j-1}(\theta) + P_{ijm_j}(\theta) = 1. \end{aligned}$$

In general,

$$P_{ijh}^* = \sum_{g=1}^h P_{ijg}(\theta). \quad (13)$$

Let  $P_{ij}(\theta)$  be given by the following multinomial probability model:

$$P_{ij}(\theta) = P(x_{ij} | \theta) = \prod_{h=1}^{m_j} P_{ijh}^{1_{\{x_{ij}=h\}}} \quad (14)$$

where

$$1_{\{x_{ij}=h\}} = \begin{cases} 1 & \text{if } x_{ij} = h \\ 0 & \text{otherwise.} \end{cases}$$

For simplicity, we drop the index  $i$  in the subsequent notation.

For the unidimensional model, Samejima (1969) defined the item information function (IIF) as:

$$\begin{aligned} I_j(\theta) &= \sum_{h=1}^{m_j} \frac{1}{P_{jh}(\theta)} \left( \frac{\partial P_{jh}(\theta)}{\partial \theta} \right)^2 \\ &= \sum_{h=1}^{m_j} \frac{(P_{jh}^*(\theta) - P_{jh-1}^*(\theta))^2}{P_{jh}^*(\theta) - P_{jh-1}^*(\theta)} \end{aligned} \quad (15)$$

The definition of information for the multidimensional case is the same as that given in the previous equation for the unidimensional case. However, in the multidimensional case, information corresponds to the composite of factors in the  $\theta$  space. At each point in the  $\theta$  space, the shape of multidimensional item response surface differs on the direction of the movement from the point. For the multidimensional model with a graded response item, Yao and Schwarz (2006) defined IIF as:

$$I_j(\theta) = \sum_{h=1}^{m_j} \frac{(\nabla_{\alpha} P_{jh}(\theta))^2}{P_{jh}(\theta)}$$

where

$\theta$ :  $p \times 1$  vector

$$\nabla_{\alpha} P_{jh}(\theta) = \left( \frac{\partial P_{jh}}{\partial \theta} \right) (\cos \alpha_j)$$

$$\left( \frac{\partial P_{jh}}{\partial \theta} \right)' = \left( \frac{\partial P_{jh}}{\partial \theta_1}, \dots, \frac{\partial P_{jh}}{\partial \theta_p} \right)$$

$$(\cos \alpha_j)' = (\cos \alpha_{j1}, \dots, \cos \alpha_{jp})$$

$\alpha$  is the vector of angles with the coordinate axes that define the direction taken from the  $\theta$  point, and  $\nabla_{\alpha}$  is the directional derivatives in the direction  $\alpha$ .

In the bi-factor model, the IIF expression can be written as:

$$I_j(\theta) = \sum_{h=1}^{m_j} \left( \frac{1}{P_{jh}(\theta)} \right) \left( \left( \frac{\partial P_{jh}}{\partial \theta_1}, \frac{\partial P_{jh}}{\partial \theta_2} \right) \cdot (\cos \alpha_{j1}, \cos \alpha_{j2})' \right)^2 \quad (17)$$

where  $\theta_1$  and  $\theta_2$  are primary and secondary factors, respectively. Under the normal ogive model, the boundary probability is given by:

$$\begin{aligned} P_{jh}^*(\theta) &= \Phi(z_{jh}) \\ &= \int_{-\infty}^{z_{jh}} \frac{1}{\sqrt{2\pi}} e^{-\frac{t^2}{2}} dt \end{aligned}$$

where

$$z_{jh} = a_{j1}\theta_1 + a_{j2}\theta_2 + c_{jh}$$

Then, the IIF has a specific form:

$$I_j(\theta) = \sum_{h=1}^{m_j} \left( \frac{1}{P_{jh}} \right) \left[ (a_{j1}\phi(z_{jh}) - a_{j1}\phi(z_{jh-1}), a_{j2}\phi(z_{jh}) - a_{j2}\phi(z_{jh-1})) \cdot (\cos \alpha_{j1}, \cos \alpha_{j2})' \right]^2$$



$$= \left[ \sum_{h=1}^{m_j} \frac{[\phi(z_{jh}) - \phi(z_{jh-1})]^2}{\Phi(z_{jh}) - \Phi(z_{jh-1})} \right] [a_{j1} \cos \alpha_{j1} + a_{j2} \cos \alpha_{j2}]^2 \quad (18)$$

where

$$\phi(z_{jh}) = \frac{\partial \Phi(z_{jh})}{\partial z_{jh}} = \frac{1}{\sqrt{2\pi}} e^{-\frac{z_{jh}^2}{2}}.$$

Given  $\theta$  and  $a_{j1}, a_{j2}$  and  $c_{jh}$ , the first term of the right hand side of (18)

$$\sum_{h=1}^{m_j} \frac{(\phi(z_{jh}) - \phi(z_{jh-1}))^2}{\Phi(z_{jh}) - \Phi(z_{jh-1})}$$

is constant; so at a fixed point of  $\theta$ ,  $I_j(\theta)$  depends only on the direction  $\alpha$ . Two special but important cases are

$$I_j(\theta) = \sum_{h=1}^{m_j} \frac{(a_{j1}[\phi(z_{jh}) - \phi(z_{jh-1})])^2}{\Phi(z_{jh}) - \Phi(z_{jh-1})} \quad (19)$$

which is the item information associated with a change in a primary factor, but no change in a secondary factor, and

$$I_j(\theta) = \sum_{h=1}^{m_j} \frac{(a_{j2}[\phi(z_{jh}) - \phi(z_{jh-1})])^2}{\Phi(z_{jh}) - \Phi(z_{jh-1})} \quad (20)$$

which is the item information associated with a change in a secondary factor, but no change in a primary factor. It should be noted that the previous two equations depend on both the primary  $\theta_1$  and  $a_{j1}$ , and secondary  $\theta_2$  and  $a_{j2}$  factors and loadings.

When we are interested in estimating the IIF for  $\theta_1$  in the presence of other sub-domains, the sub-domains can be integrated out of the objective function. Suppose that for the purpose of computerized adaptive testing (CAT),  $\theta_1$  is our focus; however,  $\theta_2$  is also present in a bi-factor model. In this case, we are interested in obtaining  $I_j(\theta_1)$ , which is a function only of  $\theta_1$ . To get  $I_j(\theta_1)$ , we integrate the previous bi-factor IIF expression with the conditional distribution  $h(\theta_2 | \theta_1)$  of  $\theta_2$  and obtain

$$I_j(\theta_1) = \sum_{h=1}^{m_j} \int \frac{[\phi(z_{jh}) - \phi(z_{jh-1})]^2}{\Phi(z_{jh}) - \Phi(z_{jh-1})} h(\theta_2 | \theta_1) d\theta_2, \quad (21)$$

which provides an estimate of the information associated with  $\theta_1$  averaged over the  $\theta_2$  distribution. It is this expression that we have used as the basis for selecting items with maximal information in the CAT-DI.

## 7 Computerized Adaptive Testing

The bi-factor model is extremely useful for CAT of multidimensional data. The conditional dependencies produced by the sub-domains can be directly incorporated in trait estimation and item information functions as shown in the previous two sections, leading to improved estimates of uncertainty and elimination of pre-mature termination of the CAT and potential bias in the estimated trait score. After each item administration, the primary ability estimate and posterior standard deviation (PSD) are re-computed, and based on the estimate of  $\theta_1$ , the item with maximal information is selected as the next item to be administered. This process continues until the PSD is less than a threshold value (*e.g.*, 0.3). Once the primary dimension has been estimated via CAT, sub-domain scores can also be estimated by adding items from the sub-domain that have not been previously administered in evaluating the primary domain, until the sub-domain score is estimated with similarly precision.

When the trait score is at a boundary ( *i.e.*, either the low or high extreme of the trait distribution), it may take a large number of items to reach the intended PSD (standard error)convergence criterion (*e.g.*,  $se=0.3$ ). In such extreme cases, we generally do not require such high levels of precision, since we know that the subject either does not suffer from the condition of interest or is among the most severely impaired. A simple solution to this problem is to add a second termination condition based on item information at the current estimate of the trait score and if there is less information than the threshold, the CAT terminates. The choice of the threshold is application specific and can be selected based on simulated CAT. A good value will affect only a small percentage of cases (*e.g.*,  $<20\%$ ) and only be used in extreme (*i.e.*, high or low) cases.

For large item banks, there may be items that are too similar to be administered within a given session. In these cases, we can declare these as "enemy items" and not administer the other members of the list of enemy items when one of the members has been administered. The idea of enemy items can be extended to the longitudinal case to insure that the same respondent is not repeatedly administered the same items on adjacent testing sessions.

CAT will often result in a subset of the entire item bank be used exclusively, because these items have the highest loadings on primary and sub-domains. Often the difference between the loadings of items that are selected by the CAT versus those that are not, are quite small and the items have similar information. To insure that the majority of the items in the item bank are administered, we can add a probabilistic component in which a selected item is only administered if a uniform random number exceeds a threshold. Typically a threshold of 0.5 works well, but again, the exact choice can be based on simulated adaptive testing, in which the largest set of unique items are used without compromising the other characteristics of the measurement process ( *i.e.*, average number of items administered and correlation with the total bank score).

## 8 References

- R. D., & Aitkin, M. (1981). Marginal maximum likelihood estimation of item parameters: Application of an EM algorithm. *Psychometrika*, *46*, 443-459.
- R. D., & Hedeker, D. (1992). Full-information item bi-factor analysis. *Psychometrika*, *57*, 423-436.
- R.D., Bock, R.D., Hedeker, D., Weiss, D., Bhaumik, D.K., Kupfer, D., Frank, E., Grochocinski, V., & Stover, A. (2007). Full-Information Item Bi-Factor Analysis of Graded Response Data. *Applied Psychological Measurement*, *31*, 4-19.
- K. J., & Swineford, F. (1937). The bi-factor method. *Psychometrika*, *2*, 41-54.
- K. G. (1969). A general approach to confirmatory maximum likelihood factor analysis. *Psychometrika*, *34*, 183-202.
- B. O. (1989). Latent variable modeling in heterogeneous populations. *Psychometrika*, *54*, 557-585.
- F. (1969). Estimation of latent ability using a response pattern of graded scores. *Psychometrika Monograph Supplement*, *17*.
- A. (1958). Equally correlated variates and the multinormal integral. *Journal of the Royal Statistical Society Series B*, *20*, 373-378.
- L. R. (1958). An inter-battery method of factor analysis. *Psychometrika*, *23*, 111-136.
- L., and Schwarz, R. D. (2006). A multidimensional partial credit model with associated item and test statistics: An application to mixed-format tests. *Applied Psychological Measurement*, *30*, 469-492.

**eTable 1. Domain: Depression**

| Subdomains | Factors                            | Facets                                          | Example Items                                                                                                                                                                     |
|------------|------------------------------------|-------------------------------------------------|-----------------------------------------------------------------------------------------------------------------------------------------------------------------------------------|
| Mood       |                                    |                                                 |                                                                                                                                                                                   |
|            | Increased negative affect          |                                                 |                                                                                                                                                                                   |
|            |                                    | Sadness<br>Depressed affect                     | I feel sad<br>I felt depressed                                                                                                                                                    |
|            |                                    | Lowered threshold for negative affect           | Do you frequently get upset over little things?<br>Do you often feel upset for no obvious reason?                                                                                 |
|            |                                    | Crying                                          | I cry more now than I used to<br>Crying easily                                                                                                                                    |
|            |                                    | Irritability                                    | I am more irritable than usual<br>Have you recently been getting edgy and bad-tempered?                                                                                           |
|            |                                    | Moodiness<br>Emotional instability              | Have you ever had the feeling you were going to pieces?<br>How much of the time have you felt emotionally stable? (-)                                                             |
|            |                                    | Poor mood distinct from grief or loss           | I feel sad, but this sadness is different from the type of sadness associated with grief or loss                                                                                  |
|            | Decreased positive affect          |                                                 |                                                                                                                                                                                   |
|            |                                    | Loss of pleasure                                | I don't enjoy things the way I used to<br>I do not feel my usual sense of enjoyment from pleasurable activities                                                                   |
|            |                                    | Loss of interest                                | I notice that I am less interested in people or activities<br>Nothing was interesting or fun                                                                                      |
|            |                                    | Loss of positive reactivity                     | I felt that I could not shake off the blues, even with help from my family or friends<br>How much of the time have you felt so down in the dumps that nothing could cheer you up? |
|            |                                    |                                                 |                                                                                                                                                                                   |
| Cognition  |                                    |                                                 |                                                                                                                                                                                   |
|            | Deficits in information-processing |                                                 |                                                                                                                                                                                   |
|            |                                    | Problems in attention and concentration         | I had trouble keeping my mind on what I was doing<br>Do you have trouble concentrating?                                                                                           |
|            |                                    | Problems in decision-making and problem-solving | How much of the time did you have difficulty reasoning and solving problems; for example, making plans, making decisions, learning new things?<br>Trouble making decisions        |
|            |                                    | Memory problems                                 | Do you feel you have more problems with memory than most?<br>Trouble remembering things                                                                                           |
|            |                                    | Mental slowing                                  | I find that my thinking is slowed down or my voice sounds dull or flat<br>How much of the time did you react slowly to things that were said or done?                             |
|            | Unproductive information-          |                                                 |                                                                                                                                                                                   |

| Subdomains | Factors                                           | Facets                                                 | Example Items                                                                                                                           |
|------------|---------------------------------------------------|--------------------------------------------------------|-----------------------------------------------------------------------------------------------------------------------------------------|
|            | processing                                        |                                                        |                                                                                                                                         |
|            |                                                   | Rumination                                             | Do you worry a lot about the past?<br>Repeated unpleasant thoughts that won't leave your mind                                           |
|            |                                                   | Pessimism                                              | Pessimistic about the future                                                                                                            |
|            | Impaired view of self                             |                                                        |                                                                                                                                         |
|            |                                                   | Self-criticism                                         | I am critical of myself for my weaknesses or mistakes<br>Disappointed in myself                                                         |
|            |                                                   | Worthlessness                                          | Do you feel pretty worthless the way you are now?<br>Have you recently been thinking of yourself as a worthless person?                 |
|            |                                                   | Thoughts of being physically unattractive              | I am worried that I am looking old or unattractive<br>Felt unattractive                                                                 |
|            | Negative social cognition                         |                                                        |                                                                                                                                         |
|            |                                                   | Loneliness<br>Decreased sense of closeness and support | How much of the time have you felt loved and wanted? (-)<br>Feeling lonely                                                              |
|            |                                                   | Interpersonal alienation and sensitivity               | I have occasionally felt rejected, slighted, criticized, or hurt by others<br>Feeling others do not understand you or are unsympathetic |
|            | Hopelessness                                      |                                                        | Do you feel that your situation is hopeless?<br>Have you recently felt that life is entirely hopeless?                                  |
|            | Helplessness<br>Loss of mastery and self-efficacy |                                                        | Do you often feel helpless?<br>Have you recently felt on the whole that you were doing things well?                                     |
|            | Guilt<br>Sense of punishment                      |                                                        | I feel guilty a good part of the time<br>Feelings of guilt                                                                              |
|            |                                                   |                                                        |                                                                                                                                         |
| Behavior   |                                                   |                                                        |                                                                                                                                         |
|            | Decreased activity level                          |                                                        |                                                                                                                                         |
|            |                                                   | Decreased general activity                             | Have you dropped many of your activities and interests?<br>I find it easy to do the things I used to do (-)                             |
|            |                                                   | Impaired functioning                                   | How often has feeling depressed interfered with what you usually do?<br>Could do everything I needed to do (-)                          |
|            |                                                   |                                                        |                                                                                                                                         |
|            | Decreased energy and vitality                     |                                                        |                                                                                                                                         |

| Subdomains         | Factors                                    | Facets                                                                                                               | Example Items                                                                                                                                   |
|--------------------|--------------------------------------------|----------------------------------------------------------------------------------------------------------------------|-------------------------------------------------------------------------------------------------------------------------------------------------|
|                    |                                            | Need for increased physical effort                                                                                   | I felt that everything I did was an effort<br>Took extra effort to get started                                                                  |
|                    |                                            | Fatigue                                                                                                              | I get tired more easily than I used to<br>I get tired more easily than usual                                                                    |
|                    |                                            | Physical retardation                                                                                                 | I have occasionally experienced periods of feeling physically weighted down and without physical energy....<br>I feel as if I am slowed down    |
|                    | Interpersonal changes                      |                                                                                                                      |                                                                                                                                                 |
|                    |                                            | Interpersonal conflict and impairment                                                                                | How much of the time did you get along with people in your family? (-)<br>How much of the time did you get along well in social situations? (-) |
|                    |                                            | Social withdrawal and isolation                                                                                      | Do you prefer to avoid social gatherings?<br>Felt like being alone                                                                              |
|                    | Agitation                                  |                                                                                                                      | Do you often get restless and fidgety?<br>I'm often fidgety, wring my hands, or need to shift how I am sitting                                  |
|                    |                                            |                                                                                                                      |                                                                                                                                                 |
| Somatic complaints |                                            |                                                                                                                      |                                                                                                                                                 |
|                    | Sleep problems                             |                                                                                                                      |                                                                                                                                                 |
|                    |                                            | General sleep difficulties (can include difficulty falling asleep, sleep discontinuity, and early morning awakening) | I don't sleep as well as I used to<br>I have trouble sleeping at night                                                                          |
|                    |                                            | Excessive sleep                                                                                                      | I sleep no longer than 10 hours in a 24-hour period including naps                                                                              |
|                    |                                            | Troubling dreams                                                                                                     | Do you have bad dreams which upset you when you wake up?                                                                                        |
|                    | Diurnal Variation                          |                                                                                                                      | Morning is when I feel the best<br>What time of the day does your depression feel worst? Any special times                                      |
|                    | Changes in eating                          |                                                                                                                      |                                                                                                                                                 |
|                    |                                            | Changes in appetite                                                                                                  | My appetite is not as good as it used to be<br>I did not feel like eating; my appetite was poor                                                 |
|                    |                                            | Changes in eating behavior                                                                                           | I eat somewhat less often or lesser amounts of food than usual<br>I feel a need to eat more frequently than usual                               |
|                    |                                            | Changes in weight                                                                                                    | I notice that I am losing weight<br>I feel as if I've had a slight weight loss                                                                  |
|                    | Problems with gastrointestinal functioning |                                                                                                                      | I have trouble with constipation<br>I have intermittent constipation or diarrhea...                                                             |
|                    | Somatic arousal                            |                                                                                                                      | My heart beats faster than usual                                                                                                                |

| Subdomains              | Factors                                           | Facets                                 | Example Items                                                                                                                                                                                                                                                                                        |
|-------------------------|---------------------------------------------------|----------------------------------------|------------------------------------------------------------------------------------------------------------------------------------------------------------------------------------------------------------------------------------------------------------------------------------------------------|
|                         |                                                   |                                        | I have some of these symptoms: heart pounding fast, blurred vision, sweating, hot and cold flashes, chest pain, heart turning over in my chest, ringing in my ears, or shaking                                                                                                                       |
|                         | Increased pain                                    |                                        | Sometimes I get headaches or pains in my stomach, back or joints....                                                                                                                                                                                                                                 |
|                         | Poor perceived health<br>General somatic concerns |                                        | I am worried about physical problems such as aches and pains; or upset stomach; or constipation<br>Have you recently felt that you are ill?                                                                                                                                                          |
|                         |                                                   |                                        |                                                                                                                                                                                                                                                                                                      |
| Suicidality             |                                                   |                                        |                                                                                                                                                                                                                                                                                                      |
|                         | Suicidal ideation                                 |                                        |                                                                                                                                                                                                                                                                                                      |
|                         |                                                   | Thoughts that life is not worth living | I feel that life is empty or wonder if it's worth living<br>Have you recently felt that life isn't worth living?                                                                                                                                                                                     |
|                         |                                                   | Thoughts of death or self-injury       | I have thoughts of killing myself....<br>Have you recently found yourself wishing that you were dead and away from it all?                                                                                                                                                                           |
|                         |                                                   |                                        |                                                                                                                                                                                                                                                                                                      |
| Treatment of Depression |                                                   |                                        |                                                                                                                                                                                                                                                                                                      |
|                         | Actual treatment                                  |                                        | Have you had a significant period (that was not a direct result of drug/alcohol use) in which you have been prescribed medication for any psychological or emotional problem<br>How many times have you been treated for any psychological or emotional problems as an outpatient or private patient |
|                         | Perceived need                                    |                                        | Have you recently been feeling in need of some medicine to pick you up                                                                                                                                                                                                                               |

**eTable 2. Depression and Depression-Related Rating Scales**

| <b>SCALE NAME</b>                                                          | <b>SCALE ABBV</b> | <b>FOCI</b>         | <b>CIT YEAR</b> | <b>ART AUTHOR(S)</b>                                        | <b>ARTICLE TITLE</b>                                                                                                                                           | <b>JOURNAL / BOOK INFO</b> | <b>VOL</b> | <b>PAGES</b> |
|----------------------------------------------------------------------------|-------------------|---------------------|-----------------|-------------------------------------------------------------|----------------------------------------------------------------------------------------------------------------------------------------------------------------|----------------------------|------------|--------------|
| Affect Balance Scale                                                       | ABS               | Depression, Anxiety | 1969            | Bradburn NM                                                 | Structure of psychological well-being                                                                                                                          | Chicago: Aldine            |            | 267          |
| Altman Self-Rating Scale for Mania                                         | ASRM              | Depression          | 1997            | Altman EG, Hedeker DR, Peterson JL, Davis JM                | The Altman Self-Rating Mania Scale                                                                                                                             | Biol Psychiatry            | 42         | 948-955      |
| Beck Depression Inventory                                                  | BDI               | Depression          | 1961            | Beck AT, Ward CH, Mendelson M, Mock J, Erbaugh J            | An inventory for measuring depression                                                                                                                          | Arch Gen Psychiatry        | 4          | 53-63        |
| Behavior and Symptom Identification Scale: Depression and Anxiety Subscale | BASIS-32          | Depression, Anxiety | 1986            | Eisen SV, Grob MC, Klein AA                                 | BASIS: The development of a self-report measure for psychiatric inpatient evaluation                                                                           | Psychiatr Hos              | 17         | 165-171      |
| Behavior and Symptom Identification Scale: Revised                         | BASIS-R           | Depression, Anxiety | 1994            | Eisen SV, Normand SLT, Belanger AJ, Gevorkian S, Irvin EA   | BASIS-32 and the Revised Behavioral Symptom Identification Scale (BASIS-R). In: The Use of Psychological Testing for Treatment Planning and Outcome Assessment | Maurish M (Ed.)            |            |              |
| Behavioral Health Screening Measure                                        | BHSM              | Depression, Anxiety | 2003            | Zygowicz KM, Saunders SM                                    | A behavioral health screening measure for use with young adults in primary care settings                                                                       | J Clin Psychol Med Sets    | 10         | 71-77        |
| Brief Scale for Anxiety and Depression                                     | BSAD              | Depression, Anxiety | 1988            | Goldberg D, Bridges K, Duncan-Jones P, Grayson D            | Detecting anxiety and depression in general medical settings                                                                                                   | BMJ                        | 297        | 897-899      |
| Caribbean Culture-Specific Screen for Emotional Distress                   | CC-SS             | Depression          | 1998            | Abas MA, Phillips C, Carter J, Walter J, Banerjee S, Levy R | Culturally sensitive validation of screening questionnaires for depression in older African-Caribbean people living in south London                            | B J Psychiatry             | 173        | 249-254      |
| Carroll Rating Scale for Depression                                        | CRS               | Depression          | 1981            | Carroll BJ, Feinberg M, Smouse PE, Rawson SG, Greden JF     | The Carroll Rating Scale for Depression: Development, reliability and validation                                                                               | B J Psychiatry             | 138        | 194-200      |
| Center for Epidemiologic Studies Depression Scale                          | CES-D             | Depression          | 1977            | Radloff LS                                                  | A self-report depression scale for research in the general population                                                                                          | Appl Psychol Meas          | 1          | 385-401      |



|                                      |       |                     |      |                                                                  |                                                                                                                                      |                                                                           |     |           |
|--------------------------------------|-------|---------------------|------|------------------------------------------------------------------|--------------------------------------------------------------------------------------------------------------------------------------|---------------------------------------------------------------------------|-----|-----------|
| Chinese Polarity Inventory           | CPI   | Depression          | 1994 | Zheng YP, Lin KM                                                 | The reliability and validity of the Chinese Polarity Inventory                                                                       | Acta Psychiatr Scand                                                      | 89  | 126-131   |
| Crown-Crisp Experiential Index       | CCEI  | Depression, Anxiety | 1966 | Crown S, Crisp AH                                                | A short clinical diagnostic self-rating scale for psychoneurotic patients: The Middle Sex Hospital Questionnaire (M.H.Q.)            | br J Psychiatry                                                           | 112 | 917-923   |
| Depression Anxiety Stress Scale      | DASS  | Depression, Anxiety | 1993 | Lovibond SH, Lovibond PF                                         | Manual for the Depression Anxiety Stress Scales (DASS)                                                                               | Australia: Psychology Foundation Monograph, University of New South Wales |     | 339       |
| Depression Scale                     | DEPS  | Depression          | 1995 | Salokangas RKP, Poutanen O, Stengard E                           | Screening for depression in primary care: Development and validation of the Depression Scale, a screening instrument for depression  | Acta Psychiatr Scand                                                      | 92  | 38641     |
| Depression-Arkansas Scale            | D-ARK | Depression          | 2002 | Smith GR, Kramer TL, Hollenberg JA, Mosley CL, Ross RL, Burnam A | Validity of the Depression-Arkansas (D-ARK) Scale: A tool for measuring major depressive disorder                                    | Ment Health Ser Res                                                       | 4   | 167-173   |
| Diagnostic Interview for Depression  | DID   | Depression          | 1986 | Zimmerman M, Coryell W, Corenthal C, Wilson S                    | A self-report scale to diagnose major depressive disorder                                                                            | Arch Gen Psychiatr                                                        | 43  | 1076-1081 |
| Distressing Thoughts Questionnaire   | DTQ   | Depression, Anxiety | 1985 | Clark DA, de Silva P                                             | The nature of depressive and anxious intrusive thoughts: Distinct or uniform phenomena?                                              | Behav Res Ther                                                            | 23  | 383-393   |
| Edinburgh Postnatal Depression Scale | EPDS  | Depression          | 1987 | Cox JL, Holden JM, Sagovsky R                                    | Detection of postnatal depression: Development of the 10-item Edinburgh Postnatal Depression Scale                                   | B J Psychiatry                                                            | 150 | 782-786   |
| Emotional State Questionnaire        | ESQ   | Depression, Anxiety | 1999 | Alouoja A, Shlik J, Vasar V, Luuk K, Leinsalu M                  | Development and psychometric properties of the Emotional State Questionnaire, a self-report questionnaire for depression and anxiety | Nord J Psychiatr                                                          | 53  | 443-449   |
| Experiences in Close Relationships   | ECR   | Depression, Anxiety | 1998 | Brennan KA, Clark CL, Shaver PR                                  | Self-report measurement of adult attachment. In: Attachment theory and close relationships                                           | Simpson JA, Rholes WS (Eds.), Guilford, New York, NY                      |     | 46-76     |

|                                                      |        |                            |      |                                                                                                                                      |                                                                                                                                     |                                            |    |           |
|------------------------------------------------------|--------|----------------------------|------|--------------------------------------------------------------------------------------------------------------------------------------|-------------------------------------------------------------------------------------------------------------------------------------|--------------------------------------------|----|-----------|
| General 5-Spectrum Measure                           | GSM-V  | Depression, Anxiety        | 2003 | Rucci P, Frank E, Fagiolini A, Kupfer DJ, Shear MK, Dell'Osso L, Banti S, Mauri M, Grochocinski VJ, Maser JD, Endicott J, Cassano GB | Development and preliminary testing of the General 5-Spectrum Measure (GSM-V)                                                       | Depress Anx                                | 18 | 109-117   |
| General Health Questionnaire                         | GHQ    | Depression, Anxiety        | 1972 | Goldberg DP                                                                                                                          | The Detection of Psychiatric Illness by Questionnaire                                                                               | Oxford University Press, Oxford, England   |    |           |
| Geriatric Depression Scale                           | GDS    | Depression                 | 1983 | Yesavage JA, Brink TL                                                                                                                | Development and validation of a geriatric depression screening scale: A preliminary report                                          | J Psychiatry Res                           | 17 | 37-49     |
| Hopelessness Scale                                   | HS     | Depression, Anxiety        | 1974 | Beck AT, Weissman A, Lester D, Trexler L                                                                                             | The measurement of pessimism: The Hopelessness Scale                                                                                | J Consult Clin Psychol                     | 42 | 861-865   |
| Hopkins (Modified SCL-90-R)                          | ---    | Depression, Anxiety, Anger | 1994 | Derogatis LR                                                                                                                         | Symptom Checklist-90-Revised manual                                                                                                 | Minnetonka, MN: NCS Assessments            |    |           |
| Hospital Anxiety and Depression Scale                | HAD    | Depression, Anxiety        | 1983 | Zigmond AS, Snaith RP                                                                                                                | The Hospital Anxiety and Depression Scale                                                                                           | Acta Psychiatr Scand                       | 67 | 361-370   |
| Internal State Scale                                 | ISS    | Depression                 | 1991 | Bauer M, Crits-Christoph P, Ball W, Dewees E, McAllister T, Alahi P, et al.                                                          | Independent assessment of manic depressive symptoms by self-rating scale: Characteristics and implications for the study of mania   | Arch Gen Psychiatry                        | 48 | 807-812   |
| Inventory of Depressive Symptomatology - Self Report | IDS-SR | Depression                 | 1986 | Rush AJ, Giles DE, Schlessler MA, Fulton CL, Weissenburger J, Burns C                                                                | The Inventory for Depressive Symptomatology (IDS): Preliminary findings                                                             | Psychiatry Res                             | 18 | 65-87     |
| Inventory to Diagnose Depression                     | IDD    | Depression                 | 1986 | Zimmerman M, Coryell W, Corenthal C, Wilson S                                                                                        | A self-report scale to diagnose major depressive disorder                                                                           | Arch Gen Psychiatry                        | 43 | 1076-1081 |
| Kellner Symptom Questionnaire                        | KSQ    | Depression, Anxiety, Anger | 1987 | Kellner R                                                                                                                            | A symptom questionnaire                                                                                                             | J Clin Psychiatr                           | 48 | 268-274   |
| Major (ICD-10) Depression Inventory                  | ---    | Depression                 | 1998 | World Health Organization Regional Office for Europe                                                                                 | Wellbeing measures in primary health care: the Depcare Project. In: Report on a WHO Meeting, Stockholm, Sweden, 12-13 February 1998 | WHO Regional Office for Europe, Copenhagen |    |           |
| Manic Depressiveness Scale                           | MDS    | Depression                 | 1998 | Thalbourne MA, Bassett DL                                                                                                            | The Manic Depressiveness Scale: A preliminary effort at replication and extension                                                   | Psych Rpts                                 | 83 | 75-80     |

|                                             |          |                            |      |                                                                                                                                                     |                                                                                                                                     |                                                           |     |           |
|---------------------------------------------|----------|----------------------------|------|-----------------------------------------------------------------------------------------------------------------------------------------------------|-------------------------------------------------------------------------------------------------------------------------------------|-----------------------------------------------------------|-----|-----------|
| Marlowe-Crowne Social Desirability Scale    | M-CSDS   | Depression                 | 1964 | Crowne DP, Marlowe DA                                                                                                                               | The approval motive: Studies in evaluative dependence                                                                               | Wiley, New York, NY                                       |     |           |
| Mental Health Inventory                     | MHI      | Depression, Anxiety, Anger | 1983 | Veit CT, Ware JE                                                                                                                                    | The structure of psychological distress and well-being in general populations                                                       | J Consult Clin Psychol                                    | 51  | 730-742   |
| Minnesota Multiphasic Personality Inventory | MMPI-2   | Depression                 | 1989 | Butcher JN, Dahlstrom WG, Graham JR, Tellegen A, Kaemmer B                                                                                          | Minnesota Multiphasic Personality-2 (MMPI2): Manual for Administration and Scoring.                                                 | University of Minnesota Press, Minnesota, MN              |     |           |
| Montgomery-Asberg Depression Scale          | MADS     | Depression                 | 1979 | Montgomery SA, Asberg M                                                                                                                             | A new depression scale designed to be sensitive to change                                                                           | B J Psychiatr                                             | 134 | 382-389   |
| Mood and Anxiety Symptom Questionnaire      | MASQ     | Depression, Anxiety        | 1991 | Clark LA, Watson D                                                                                                                                  | Tripartite model of anxiety and depression: Psychometric evidence and taxonomic implications                                        | J Abnorm Psychol                                          | 100 | 316-336   |
| Mood Disorder Questionnaire                 | MDQ      | Depression, Anxiety        | 2000 | Hirschfield RM, Williams JB, Spitzer RL, Calabrese JR, Flynn L, Keck PE, Lewis L, McElroy S, Post RM, Rappaport DJ, Russell JM, Sachs GS, Zajecka J | Development and validation of a screening instrument for Bipolar Spectrum Disorder: The Mood Disorder Questionnaire                 | Am J Psychiatr                                            | 157 | 1873-1875 |
| MOODS-Self-Report-Lifetime                  | MOODS-SR | Depression, Anxiety        | 2002 | Dell'Osso L, Armani A, Rucci P, et al                                                                                                               | Measuring mood spectrum: Comparison of interview (SCI-MOODS) and self-report (MOODS-SR) instruments                                 | Compr Psychiatry                                          | 43  | 69-73     |
| MOS Depression Screener                     | MOS      | Depression                 | 1988 | Burnam MA, Wells KB, Leake B, Landsverk J                                                                                                           | Development of a brief screening instrument for detecting depressive disorders                                                      | Medical Care                                              | 26  | 775-789   |
| Multiple Affect Adjective Checklist         | MAACL-A  | Depression, Anxiety, Anger | 1965 | Zuckerman M, Lubin B                                                                                                                                | The Multiple Affect Adjective Check List: Manual                                                                                    | Educational and Industrial Testing Service, San Diego, CA |     |           |
| Negative Affectivity Scale                  | NAS      | Depression, Anxiety        | 1989 | Levin I, Stokes JP                                                                                                                                  | Dispositional approach to job satisfaction: Role of negative affectivity                                                            | J Appl Psychol                                            | 74  | 752-758   |
| Obsessive Intrusions Inventory              | OII      | Depression, Anxiety, Anger | 1993 | Purdon C, Clark DA                                                                                                                                  | Obsessive intrusive thought in nonclinical subjects. Part I. Content and relation with depressive, anxious and obsessional symptoms | Behav Res Ther                                            | 31  | 713-720   |

|                                           |         |                            |      |                                               |                                                                                                                                                |                                                                            |    |           |
|-------------------------------------------|---------|----------------------------|------|-----------------------------------------------|------------------------------------------------------------------------------------------------------------------------------------------------|----------------------------------------------------------------------------|----|-----------|
| Patient Health Questionnaire-9            | PHQ-9   | Depression                 | 2001 | Kroenke K, Spitzer RL, Williams JB            | The PHQ-9: Validity of a brief depression severity measure                                                                                     | J Gen Intern Med                                                           | 16 | 606-613   |
| Positive and Negative Affect Schedule     | PANAS   | Depression, Anxiety, Anger | 1988 | Watson D, Clark LA, Tellegen A                | Development and validation of brief measures of positive and negative affect: The PANAS Scales                                                 | J Per & Soc Psychol                                                        | 54 | 1063-1070 |
| Postpartum Adjustment Questionnaire       | PPAQ    | Depression, Anxiety        | 1992 | O'Hara MW, Hoffman JG, Philipps LH, Wright EJ | Adjustment in childbearing women: The Postpartum Adjustment Questionnaire                                                                      | Psychol Ass                                                                | 4  | 160-169   |
| Postpartum Depression Screening Scale     | PDSS    | Depression                 | 2000 | Beck CT, Gable R                              | Postpartum Depression Screening Scale: development and psychometric testing                                                                    | Nurs Res                                                                   | 49 | 272-282   |
| Primary Care Anxiety and Depression Scale | PCAD    | Depression, Anxiety        | 1997 | El-Rufaie OEF, Absood GH, Abou-Saleh MT       | The Primary Care Anxiety and Depression (PCAD) Scale: A culture-oriented screening scale                                                       | Acta Psychiatr Scand                                                       | 95 | 119-124   |
| Profile of Mood States                    | POMS    | Depression                 | 1964 | McNair DM, Lorr M                             | An Analysis of mood in neurotics                                                                                                               | J Ab & Soc Psychol                                                         | 69 | 620-627   |
| Profile of Mood States - Short Form       | POMS-SF | Depression                 | 1995 | Curran SL, Andrykowski MA, Studts JL          | Short form of the Profile of Mood States (POMS-SF): Psychometric information                                                                   | Psychol Ass                                                                | 7  | 80-83     |
| Psychological General Well-being Scale    | PGWB    | Depression, Anxiety, Anger | 1984 | Dupuy HJ                                      | The Psychological General Well-Being (PGWB) index. In: Assessment of Quality of Life in Clinical Trials of Cardiovascular Therapies            | Wenger NK, Mattson ME, Furberg CD, Elinson J (Eds.), Le Jacq, New York, NY |    | 170-183   |
| Self-Derogation Scale                     | SDS     | Depression, Anxiety        | 1975 | Kaplan HB                                     | Increase in self-rejection as an antecedent of deviant responses                                                                               | J Youth Adol                                                               | 4  | 281-292   |
| Self-Rating Manic Inventory               | SRMI    | Depression                 | 1992 | Shugar G, Schertzer S, Toner BB, et al.       | Development, use, and factor analysis of a self-report inventory for mania                                                                     | Compr Psychiatry                                                           | 33 | 325-331   |
| Self-Worth Protection Scale               | SWPS    | Depression, Anxiety        | 2003 | Thompson T, Dinnel DL                         | Construction and initial validation of the Self-Worth Protection Scale                                                                         | B J Ed Psychol                                                             | 73 | 89-107    |
| Sensitivity to Put-Down Scale             | SPD     | Depression, Anxiety, Anger | 2000 | Gilbert P, Miles JN                           | Sensitivity to social put-down: It's relationship to perceptions of social rank, shame, social anxiety, depression, anger and self-other blame | Pers Individ Diff                                                          | 29 | 757-774   |

|                                        |          |                            |      |                                                      |                                                                                                                                               |                                            |    |         |
|----------------------------------------|----------|----------------------------|------|------------------------------------------------------|-----------------------------------------------------------------------------------------------------------------------------------------------|--------------------------------------------|----|---------|
| Strain-Free Negative Affectivity Scale | SFNA     | Depression, Anxiety        | 1999 | Fortunato VJ, Stone-Romero EF                        | Taking the strain out of negative affectivity: Development and initial validation of scores on a strain-free measure of negative affectivity  | Ed Psychol Meas                            | 59 | 77-97   |
| Symptom Checklist-90-R                 | SCL-90-R | Depression, Anxiety, Anger | 1994 | Derogatis LR                                         | SCL-90-R, Brief Symptom Inventory, and matching clinical rating scales. In: Psychological Testing, Treatment Planning, and Outcome Assessment | Maruish M (Ed.), Erlbaum, New York, NY     |    |         |
| UCLA Loneliness Scale                  | N/A      | Depression, Anxiety        | 1996 | Russell D                                            | The UCLA Loneliness Scale (Version 3): Reliability, validity, and factor structure                                                            | J Pers Assess                              | 66 | 20-40   |
| WHO (Five) Well-Being Questionnaire    | ---      | Depression, Anxiety, Anger | 1998 | World Health Organization Regional Office for Europe | Wellbeing measures in primary health care: the Depcare Project. In: Report on a WHO Meeting, Stockholm, Sweden, 12-13 February 1998           | WHO Regional Office for Europe, Copenhagen |    |         |
| Worry Scale for Older Adults           | WS       | Depression, Anxiety        | 1988 | Wisocki PA                                           | Worry as a phenomenon relevant to the elderly                                                                                                 | Behav ther                                 | 19 | 369-379 |
| Zung Self-Rating Depression Scale      | SDS      | Depression                 | 1965 | Zung WW                                              | A self-rating depression scale                                                                                                                | Arch Gen Psychiatry                        | 12 | 63-70   |

| <b>SCALE NAME</b>                              | <b>DEPRESSION SUBDISORDER</b>              |
|------------------------------------------------|--------------------------------------------|
| Affect Grid                                    | Distress                                   |
| Affective Reaction Scale                       | Depression                                 |
| Anaclitic Dysfunctional Attitudes Scale (ADAS) | Depression                                 |
| Anhedonia Scale                                | Depression                                 |
| Anxiety-Depression-Anger Rating Scale          | Depression                                 |
| Apathy Evaluation Scale (AS)                   | Quality of Life                            |
| Assessment of Risk for Suicide                 | MDD                                        |
| Automatic Thoughts Questionnaire (ATQ)         | Depression; General Anxiety; Distress      |
| Barthel's Functional Index (BFI)               | Social Functioning                         |
| Beck Cognitive Insight Scale                   | Cognition                                  |
| Beigel Murphy Scale (MSRS)                     | Mania                                      |
| Belcher Extended Loneliness Scale (BELS)       | Depression                                 |
| Berlin Mood Questionnaire                      | MOOD                                       |
| Bipolar Depression Rating Scale (BDRS)         | Mania                                      |
| Birleson Depression Self-Rating Scale (DSRS)   | Depression                                 |
| Brief Anxiety Scale                            | MOOD                                       |
| Brief Depression Rating Scale                  | Depression                                 |
| Brief Depression Scale (BDS)                   | Depression                                 |
| Brief Disability Questionnaire                 | MOOD                                       |
| Brief Outpatient Psychopathology Scale         | Elderly Depression                         |
| Brief Psychiatric Rating Scale (BPRS)          | Mania; Depression; General Physical Health |
| Brief Symptom Inventory (BSI)                  | Quality of Life                            |
| Bunney-Hamburg Scale                           | Depression                                 |
| Calgary Depression Scale                       | Depression                                 |
| California Psychological Inventory (CPI)       | Depression                                 |
| California Q-Set Alexithymia Prototype         | Depression                                 |
| CBIS Multidimensional Rating Task              | Depression                                 |
| Characterological Self-Blame for Depression    | Depression                                 |

|                                                      |                         |
|------------------------------------------------------|-------------------------|
| Chicago Multiscale Depression Inventory (CMDI)       | Depression; MOOD        |
| Child Behavior Checklist (CBCL)                      | Depression              |
| Chronic and Acute Stress Scales                      | Distress                |
| Clinical Global Impression Scale (CGI)               | Mania; Substance Abuse  |
| Clinical Health Assessment Questionnaire (CLINHAQ)   | General Physical Health |
| Clinically Useful Depression Outcome Scale (CUDOS)   | Depression              |
| Cognition Checklist                                  | General Anxiety         |
| Cognitive Complaints Inventory                       | Cognition               |
| Cognitive Function Scale                             | Mania                   |
| Cognitive Problems Checklist                         | Cognition               |
| Cognitive Triad Inventory                            | Social Functioning      |
| Comprehensive Psychopathological Rating Scale (CPRS) | Depression; Mania; MOOD |
| Crandell Cognitions Inventory (CCI)                  | Agoraphobia             |
| Current Mood                                         | MOOD                    |
| Degree of Illness Rating                             | Depression              |
| Demoralization Scale                                 | Distress                |
| Dependent and Self-Critical Scale                    | Depression              |
| Depression Adjective Check List (DACL)               | Depression; MOOD        |
| Depression Attitude Questionnaire - Adapted          | Depression              |
| Depression Information Measure                       | Depression              |
| Depression Measure                                   | Depression              |
| Depression Outcomes Module                           | Elderly Depression      |
| Depression Retardation Rating Scale (DRRS)           | Cognition               |
| Depression Scale                                     | Distress                |
| Depression Screening Questionnaire                   | MDD                     |
| Depression Status Inventory                          | Depression              |
| Depression Symptom Survey                            | Depression              |
| Depression Symptoms                                  | Distress                |
| Depression-Happiness Scale                           | Depression              |
| Depression-Relevant Mood Dimensions Scale            | Depression              |

|                                                                     |                                                    |
|---------------------------------------------------------------------|----------------------------------------------------|
| Depressive Cognition Scale                                          | Elderly Depression                                 |
| Depressive Content Scale                                            | Depression                                         |
| Depressive Experiences Questionnaire (DEQ)                          | Depression                                         |
| Depressive Symptom Scale                                            | Cognition                                          |
| Depressive Symptomology                                             | Depression                                         |
| Depressive Symptoms Checklist                                       | Elderly Depression                                 |
| Depressive Symptoms Measure                                         | Depression; Postpartum                             |
| Diagnostic and Statistical Manual of Mental Disorders - Self-Rating | Depression                                         |
| Diagnostic Inventory for Depression                                 | Depression                                         |
| Dysfunctional Attitude Scale (DAS)                                  | Depression; Social Functioning; Elderly Depression |
| Dysphoria Scale                                                     | Depression                                         |
| Eight State Questionnaire                                           | MOOD                                               |
| Emotional Distress                                                  | Distress                                           |
| Energetic Arousal and Exhaustion Scale                              | Depression                                         |
| Experience of Depression                                            | Depression                                         |
| Frankfurt Complaints Questionnaire (FCQ)                            | Mania                                              |
| Frequency of Emotional Expressions                                  | Depression                                         |
| Functioning Outcomes Inventory                                      | Depression                                         |
| General Behavior Inventory                                          | Depression                                         |
| Generalized Contentment Scale                                       | Depression; MOOD                                   |
| Geriatric Hopelessness Scale                                        | Elderly Depression                                 |
| Global Severity Index (GSI)                                         | Quality of Life                                    |
| Goldberg Depression Scale                                           | Depression                                         |
| Groningen Social Disability Schedule                                | Social Functioning                                 |
| Happiness and Depression Scale                                      | Depression                                         |
| Health and Life Experiences Questionnaire (HLEQ)                    | MDD                                                |
| Hope/Expectancy Prognostic Index                                    | Depression                                         |
| Hopelessness Depression Symptom Questionnaire (HDSQ)                | Depression                                         |
| Illness Behavior Questionnaire (IBQ)                                | General Physical Health                            |
| Illness Intrusiveness Rating Scale (IIRS)                           | Quality of Life                                    |



|                                                                |                    |
|----------------------------------------------------------------|--------------------|
| Indicators of Complicated Grief Measure                        | Depression         |
| Interpersonal Sensitivity Measure                              | Social Functioning |
| Inventory of Depressive Symptoms - Modified                    | Depression         |
| Inventory of General Life Functioning (GLF)                    | Quality of Life    |
| Inventory to Diagnose Depression (IDD)                         | Depression         |
| Iowa Self-Assessment Inventory (ISAI)                          | Depression         |
| IPAT Depression Scale                                          | Depression         |
| Irrational Beliefs Test (IBT)                                  | Cognition          |
| Irritability Depression and Anxiety Scale                      | Depression         |
| Irritability-Depression-Anxiety Scale (IDA)                    | Aggression         |
| Job-Related Depression and Anxiety Scales                      | Depression         |
| Judgments of Emotion                                           | Depression         |
| Ketterer Stress Symptom Frequency Checklist - Revised (KSSFCR) | Distress           |
| Levine-Pilowsky Inventory                                      | Depression         |
| Lifetime Depression Index                                      | Depression         |
| Lifetime History of Depression                                 | Depression         |
| Loss Inventory                                                 | Depression         |
| Loss Questionnaire                                             | Depression         |
| Major Depression Questionnaire                                 | Distress           |
| Management of Depression Survey                                | Depression         |
| Manic Screening Measure                                        | Mania              |
| Measures of Affect                                             | Depression         |
| Measures of Mental Health                                      | Depression         |
| Medical Outcomes Survey - Short Form                           | Social Functioning |
| Mental Health Index                                            | Mania              |
| Mental Health Index - 17                                       | Mania              |
| Metacognitive Awareness Questionnaire                          | Depression         |
| Millon Clinical Multiaxial Inventory (MCMI)                    | Depression         |
| Modified Barthel Index (MBI)                                   | Quality of Life    |
| Mood Adjective Check List (MACL)                               | MOOD               |

|                                                           |                                             |
|-----------------------------------------------------------|---------------------------------------------|
| Mood Disorders Insight Scale                              | MOOD                                        |
| Mood Monitor Measure                                      | MOOD                                        |
| Mood Profile                                              | MOOD                                        |
| Mood Scale                                                | Depression                                  |
| Mosher Guilt Scale                                        | Social Functioning                          |
| Multiple Visual Analog Scale (MVAS)                       | Mania                                       |
| Multiple Visual Analogue Scales of Bipolarity (MVAS-BP)   | Mania                                       |
| Multiscale Depression Inventory (MDI)                     | Depression                                  |
| Nottingham Health Profile (NHP)                           | General Physical Health; Social Functioning |
| Oswestry Disability Scale                                 | Social Functioning                          |
| Overall Psychological Health Status                       | Elderly Depression                          |
| Peer Nomination Inventory of Depression                   | Depression                                  |
| Penate Basic Depression Questionnaire                     | Depression                                  |
| Perceived Incontrollability of Depression                 | Depression                                  |
| Personal Beliefs Inventory                                | Depression                                  |
| Personal Disturbance Scale                                | Depression                                  |
| Personal History of Depressive Disorders                  | Depression                                  |
| Personality Assessment Inventory (PAI)                    | Personality; General Anxiety                |
| Philadelphia Geriatric Center Morale Scale                | Depression                                  |
| Postpartum Depression Checklist                           | Postpartum                                  |
| Postpartum Depression Screening Scale (PDSS)              | Postpartum                                  |
| Present Day Feelings of Depressed Affect                  | Elderly Depression                          |
| Primary Care Evaluation of Mental Disorders Questionnaire | Depression                                  |
| Psychological Distress Scale                              | Distress                                    |
| Psychological Functioning Index                           | Substance Abuse                             |
| Psychological Self-Rating Form                            | Depression                                  |
| Psychological Symptoms Scale                              | General Physical Health                     |
| Psychosomatic Symptoms                                    | Distress                                    |
| Quality of Life in Depression Scale (QLDS)                | Depression; Mania; Quality of Life          |
| Quality of Life in Mental Health                          | Quality of Life                             |

|                                                               |                                                 |
|---------------------------------------------------------------|-------------------------------------------------|
| Rand Depression Screener (RDS)                                | Depression                                      |
| Rand Mental Health Inventory                                  | Depression                                      |
| Raskin Depression Scale                                       | Depression                                      |
| Recent Appearance of Depression Assessed By Relatives (RADAR) | Depression                                      |
| Reiss Screen for Maladaptive Behavior                         | Depression; Aggression                          |
| Response to Depression Questionnaire                          | Depression                                      |
| Reynolds Adolescent Depression Scale - Child Version          | Depression                                      |
| Reynolds Adolescent Depression Scale - Parent Version         | Depression                                      |
| Role Limitations Scale                                        | Depression                                      |
| Scale for Suicide Ideation (SSI)                              | Mania                                           |
| Schema Questionnaire                                          | Depression                                      |
| Schwab-Gilleard Depression Scale (SGDS)                       | Depression                                      |
| Screener for Depressive Disorders                             | Depression                                      |
| Seasonal Pattern Assessment Questionnaire (SPAQ)              | Depression                                      |
| Self-Efficacy                                                 | Distress                                        |
| Self-Labeled Current Depression                               | Depression                                      |
| Self-Preoccupation Scale (SPS)                                | Distress; General Anxiety                       |
| Self-Rating Depression Scale (SDS)                            | Depression; Elderly Depression; Quality of Life |
| Self-Rating Mania Scale (ASRM)                                | Mania                                           |
| Self-Rating Questionnaire                                     | Postpartum                                      |
| Self-Rating Scale for Affective Syndromes (CPRS-S-A)          | Mania; MOOD                                     |
| Self-Report Depression Questionnaire (SRDQ)                   | Depression                                      |
| Self-Reported History of Depression                           | MOOD                                            |
| Self-Reported Sadness-Sympathy Measure                        | MOOD                                            |
| Shah Depression Scale (SSDS)                                  | Depression                                      |
| Short Form 12 (SF-12)                                         | Quality of Life                                 |
| Signs of Depression Scale (SODS)                              | MOOD                                            |
| Snaith-Hamilton Pleasure Scale                                | Quality of Life; Depression                     |
| Sociotropy-Autonomy Scale (SAS)                               | Depression                                      |
| SPHERE                                                        | MOOD                                            |

|                                                     |                                           |
|-----------------------------------------------------|-------------------------------------------|
| Stanford Health Assessment Questionnaire            | General Physical Health                   |
| Stress Questionnaire                                | Distress                                  |
| Survey Psychiatric Assessment Schedule              | Elderly Depression                        |
| Symptom Questionnaire (SQ)                          | Depression                                |
| Symptom Rating Test                                 | Distress                                  |
| Toronto Alexithymia Scale - Revised (TAS-R)         | Depression                                |
| Toronto Alexithymia Scale (TAS)                     | Depression; MOOD; General Physical Health |
| Total Depression Inventory                          | Depression                                |
| Trait Meta-Mood Scale (TMMS)                        | Depression                                |
| Transient Moods                                     | MOOD                                      |
| University of British Columbia Cognitions Inventory | Cognition                                 |
| Unpleasantness Scale                                | Depression                                |
| Visual Analogue Mood Scales (VAMS)                  | MOOD                                      |
| Vulnerability to Depression Questionnaire (VDQ)     | Depression                                |
| Wakefield Self-Assessment Depression Inventory      | Depression; Elderly Depression            |
| Watson-Glaser Critical Thinking Appraisal           | Depression                                |
| Weschler Depression Rating Scale                    | Depression                                |
| Whiteley Index                                      | General Physical Health                   |
| Young Mania Rating Scale (YMRS)                     | Mania; General Physical Health            |
| Youth Self-Report (YSR)                             | Depression                                |

| <b>SUBDISORDER</b>                                 | <b>COUNT BY SUBDISORDER</b> |
|----------------------------------------------------|-----------------------------|
| Aggression                                         | 1                           |
| Agoraphobia                                        | 1                           |
| Cognition                                          | 7                           |
| Depression                                         | 94                          |
| Depression; Aggression                             | 1                           |
| Depression; Elderly Depression                     | 1                           |
| Depression; Elderly Depression; Quality of Life    | 1                           |
| Depression; General Anxiety; Distress              | 1                           |
| Depression; Mania; MOOD                            | 1                           |
| Depression; Mania; Quality of Life                 | 1                           |
| Depression; MOOD                                   | 3                           |
| Depression; MOOD; General Physical Health          | 1                           |
| Depression; Postpartum                             | 1                           |
| Depression; Social Functioning; Elderly Depression | 1                           |
| Distress                                           | 13                          |
| Distress; General Anxiety                          | 1                           |
| Elderly Depression                                 | 8                           |
| General Anxiety                                    | 1                           |
| General Physical Health                            | 5                           |
| General Physical Health; Social Functioning        | 1                           |
| Mania                                              | 11                          |
| Mania; Depression; General Physical Health         | 1                           |
| Mania; General Physical Health                     | 1                           |
| Mania; MOOD                                        | 1                           |
| Mania; Substance Abuse                             | 1                           |
| MDD                                                | 3                           |
| MOOD                                               | 15                          |
| Personality; General Anxiety                       | 1                           |
| Postpartum                                         | 3                           |
| Quality of Life                                    | 8                           |
| Quality of Life; Depression                        | 1                           |
| Social Functioning                                 | 7                           |
| Substance Abuse                                    | 1                           |
